# Supplementary material
Source: MDPI journal article supplement (https://www.mdpi.com/2311-7524/8/8/733)
Supplement: s1 [file s1]

## SUPPLEMENT

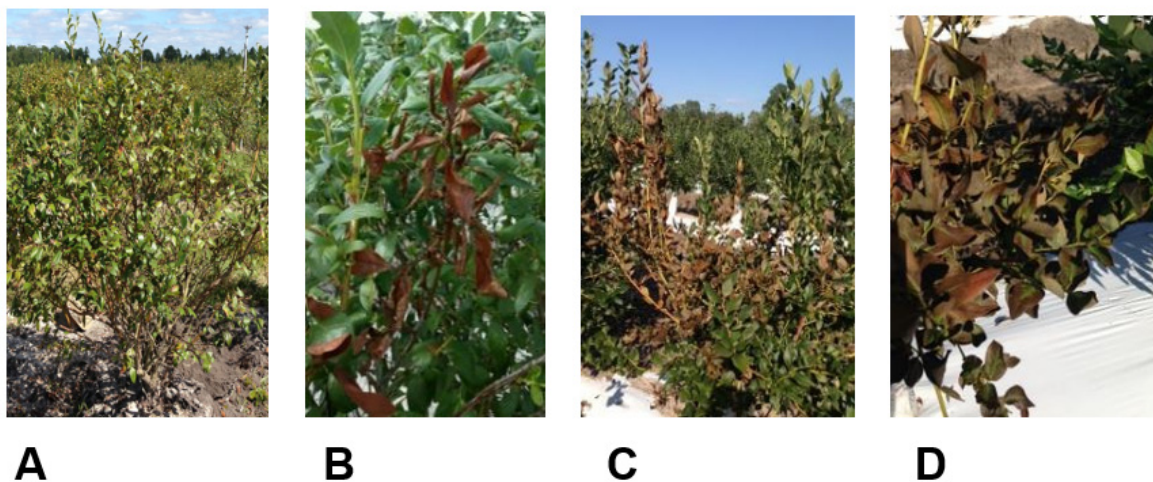

**Supplemental Figure S1.** *Botryosphaeria* stem blight severity classes used to pre-select plants in the stem blight survey in relation to bark inclusions: asymptomatic (**A**), light (**B**), moderate (**C**), and severe (**D**).
